# Supplementary material for: Legacy health effects among never smokers exposed to occupational secondhand smoke
Source: PLoS One. 2019 Apr 18;14(4):e0215445. doi: 10.1371/journal.pone.0215445 (PMC6472795; doi:10.1371/journal.pone.0215445)
Supplement: S3 Table — (DOCX) [file pone.0215445.s003.docx]

S3 Table. Associations between SHTS exposure before 1995 and health outcomes among never smoking flight attendants (Harvard FAHS, 2014-2015).1

| **Health Outcome** | **Exposure Odds Ratio** | **95% Confidence Interval** | **N Cases** |
| --- | --- | --- | --- |
| Cancer | | | |
| Breast Cancer | 1·01 | 0·93, 1·08 | 109 |
| Cervical Cancer | 1·07 | 0·77, 1·33 | 27 |
| Uterine Cancer | 1·08 | 0·89, 1·35 | 16 |
| Basal Cell Carcinoma | 0·97 | 0·92, 1·02 | 253 |
| Squamous Cell Carcinoma | 0·90 | 0·82, 0·98 | 117 |
| Melanoma | 1·00 | 0·89, 1·11 | 79 |
| Thyroid Cancer | 1·02 | 0·81, 1·31 | 20 |
| Cardiac and Cardiopulmonary | | | |
| Deep Vein Thrombosis | 0·96 | 0·88, 1·03 | 99 |
| Pulmonary Embolism | 1·03 | 0·82, 1·43 | 30 |
| Arrhythmia | 1·05 | 0·92, 1·14 | 81 |
| Myocardial Infarction | 1·28 | 1·00, 2·08 | 16 |
| Hypercholesterolemia | 1·02 | 0·98, 1·06 | 498 |
| Peripheral Artery Disease | 1·13 | 0·79, 1·97 | 16 |
| Hypertension | 0·98 | 0·94, 1·03 | 407 |
| Transient Ischemic Attack | 1·23 | 0·94, 2·00 | 13 |
| Coronary Heart Disease | 1·01 | 0·83, 1·18 | 30 |
| COPD | 1·01 | 0·77, 1·34 | 18 |
| Lower and Upper Respiratory | | | |
| Asthma | 0·96 | 0·90, 1·01 | 266 |
| Pneumothorax | 1·18 | 1·00, 1·50 | 29 |
| Bronchitis | 0·94 | 0·86, 1·00 | 149 |
| Repeated Pneumonia | 1·04 | 1·00, 1·07 | 664 |
| Sinusitis | 0·96 | 0·91, 1·00 | 476 |

COPD: Chronic Obstructive Pulmonary Disease; FAHS: Flight Attendant Health Study; SHTS: Secondhand Tobacco Smoke

1. Models were adjusted for three-year birth window, gender, and race, and each OR is in relation to units of a years’ employment in SHTS conditions.
